# Supplementary material for: Multi-Omic Data Integration Allows Baseline Immune Signatures to Predict Hepatitis B Vaccine Response in a Small Cohort
Source: Front Immunol. 2020 Nov 30;11:578801. doi: 10.3389/fimmu.2020.578801 (PMC7734088; doi:10.3389/fimmu.2020.578801)
Supplement: Supplementary file 2 [file Table_1.xlsx]

## Sheet: Sheet1
Target	Fluorochrome	Clone	Catalog Number	Antibody Dilution
FVD	APC-efluor 780		ebio 65-0865-14	1/100
CD64	Alex 700	10.1	BD 561188	1/100
CD11c	APC-efluor 780	Bu15	ebio 17-0128-42	1/100
CD123	PE-Cy7	6H6	ebio 25-1239-42	1/100
CD3	PE-CF-594	UCHT1	BD 562280	1/100
gd TCR	PE	B1.1	ebio 12-9959-42	1/100
CD56	BV650	HCD56	Biolegend 318344	1/100
CD11b	BV786	ICRF44	Biolegend 301346	1/100
CD66/SA	BV711/SA	ASL-32	Customized biolegend 95628	1/100
CD16	FITC	3G8	BD 555406	1/100
HLA-DR	eFluor605	LN3	ebio 639956-42	1/100
CD14	V500	M5E2	BD561391	1/100
CD45	V450	HI30	BD 560367	1/100
